# Supplementary material
Source: PubMed Central journal article supplement (PMC2861859)
Supplement: NIHMS186539-supplement-1.pdf [file NIHMS186539-supplement-1.pdf]

# Coordination Modes of Multidentate Ligands in *fac*- [Re(CO)<sub>3</sub>(polyaminocarboxylate)] Analogues of <sup>99m</sup>Tc Radiopharmaceuticals. Dependence on Aqueous Solution Reaction Conditions

*Malgorzata Lipowska,<sup>†</sup> Haiyang He,<sup>†</sup> Xiaolong Xu,<sup>†</sup> Andrew T. Taylor,<sup>†</sup> Patricia*

*A. Marzilli,<sup>‡</sup> and Luigi G. Marzilli,<sup>\*,‡</sup>*

Department of Radiology, Emory University, Atlanta, GA 30322, USA

Department of Chemistry, Louisiana State University, Baton Rouge, LA 70803, USA

## Supporting Information

**Figure S1.** <sup>1</sup>H NMR spectrum of complex **5**, [Re(CO)<sub>3</sub>(DTGH)-NNO]<sup>+</sup>, in D<sub>2</sub>O, pH 4.8.

**Figure S2.** <sup>1</sup>H NMR spectrum of complex **9**, [Re(CO)<sub>3</sub>(DTMH)-NNO], in D<sub>2</sub>O, pH ~ 6.

**Figure S3.** <sup>1</sup>H NMR spectra of complex **10**, [Re(CO)<sub>3</sub>(DTM-NNN)]<sup>-</sup>:

**A.** in H<sub>2</sub>O, pH ~ 9; spectrum with additional NH-coupling

**B.** in D<sub>2</sub>O, pH 11.6; spectrum without NH-coupling

**Table S1.** Re-C Bond Distances (Å) and C-Re-C Bond Angles (°) of [Re(CO)<sub>3</sub>(DTGH)-NNO]PF<sub>6</sub>•H<sub>2</sub>O (**5** PF<sub>6</sub>•H<sub>2</sub>O), [Re(CO)<sub>3</sub>(DTG)-NNO]•H<sub>2</sub>O (**6**•H<sub>2</sub>O), [Re(CO)<sub>3</sub>(UEDDAH)-NNO] (**8**), [Re(CO)<sub>3</sub>(DTMH)-NNO]•2H<sub>2</sub>O (**9**•2H<sub>2</sub>O) and [Re(CO)<sub>3</sub>(DTA)-NNN]•CH<sub>3</sub>OH (**12**•CH<sub>3</sub>OH).

**Figure S1.**  $^1\text{H}$  NMR spectrum of complex **5**,  $[\text{Re}(\text{CO})_3(\text{DTGH})\text{-NNO}]^+$ , in  $\text{D}_2\text{O}$ , pH 4.8.

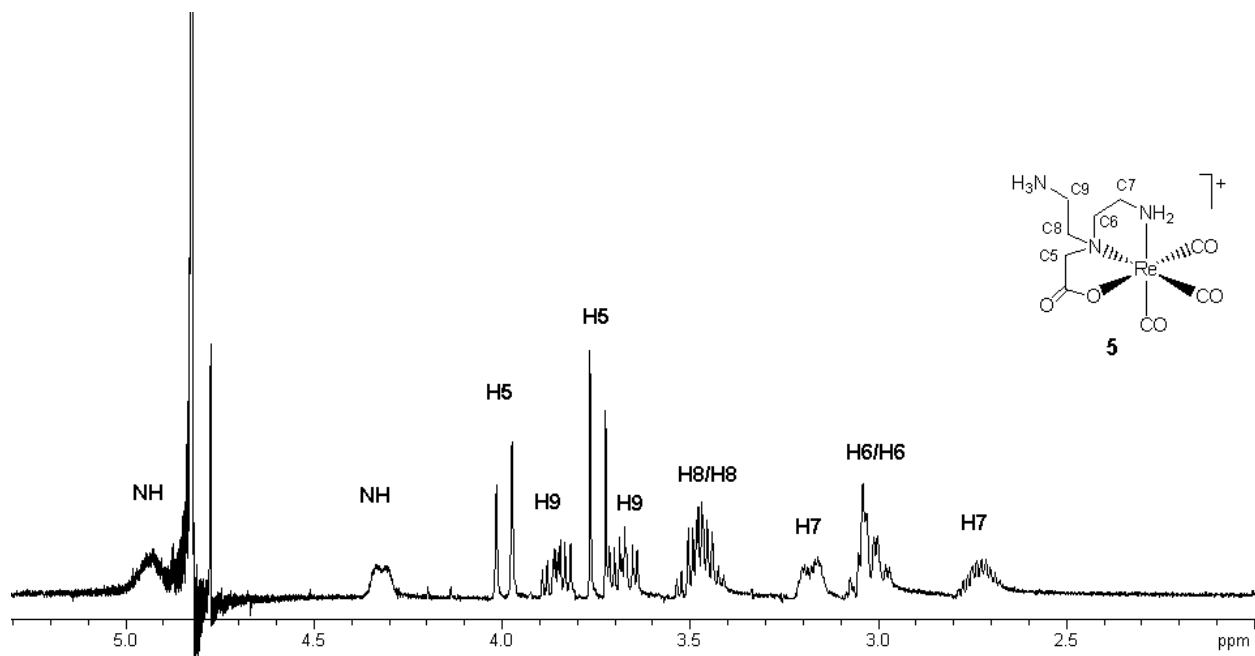

**Figure S2.**  $^1\text{H}$  NMR spectrum of complex **9**,  $[\text{Re}(\text{CO})_3(\text{DTMH})\text{-NNO}]$ , in  $\text{D}_2\text{O}$ , pH 6.

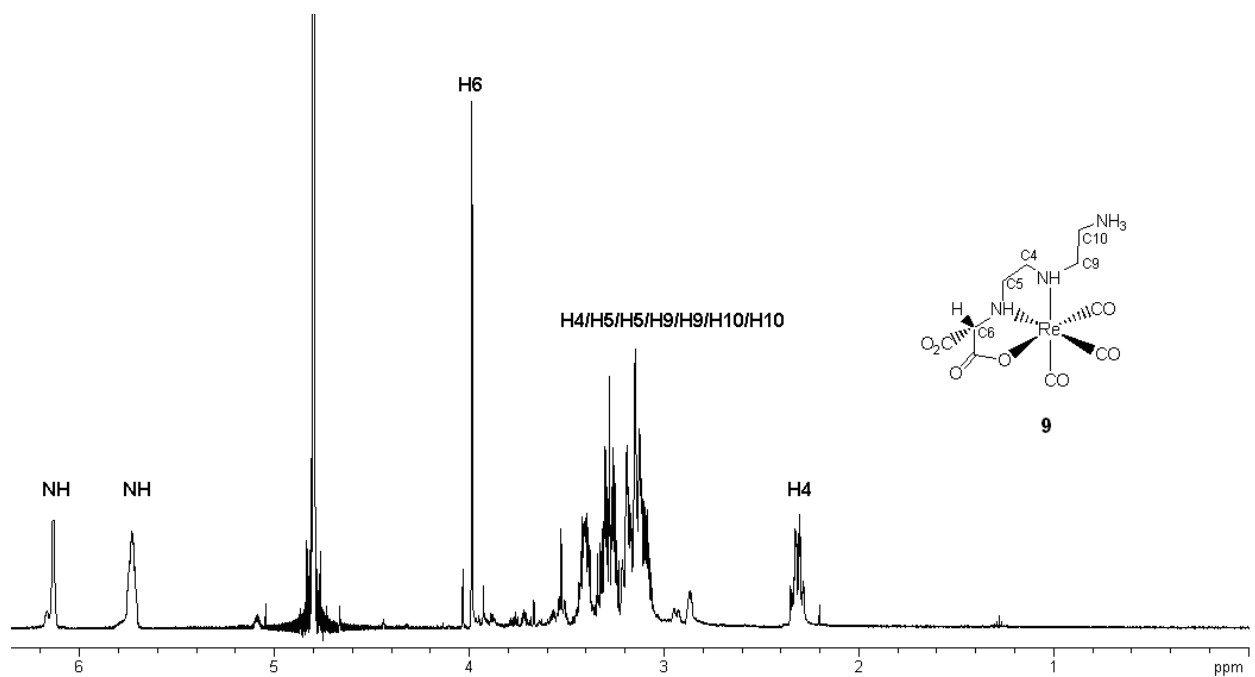

**Figure S3.**  $^1\text{H}$  NMR spectra of complex **10**,  $[\text{Re}(\text{CO})_3(\text{DTM-NNN})]^-$ .

**A:** in  $\text{H}_2\text{O}$ , pH 9; spectrum with additional NH-coupling

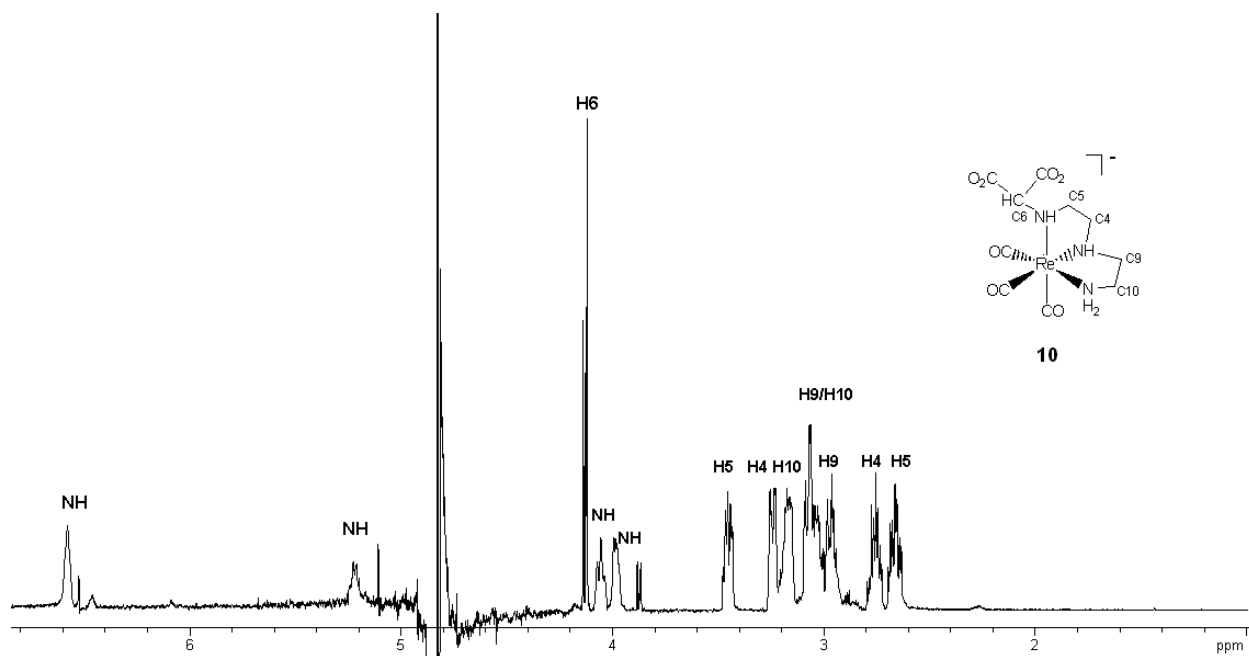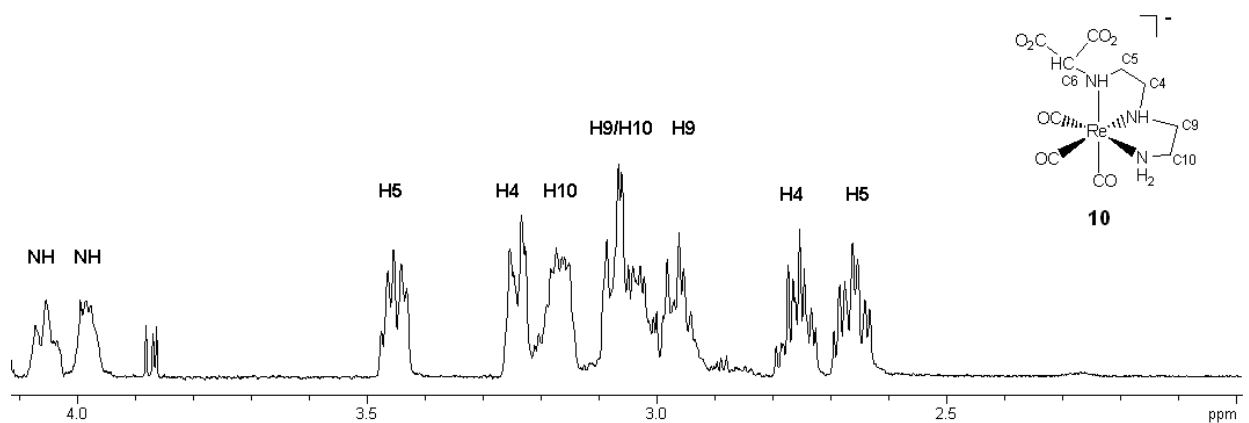

**B:** in D<sub>2</sub>O, pH 11.6; spectrum without NH-coupling

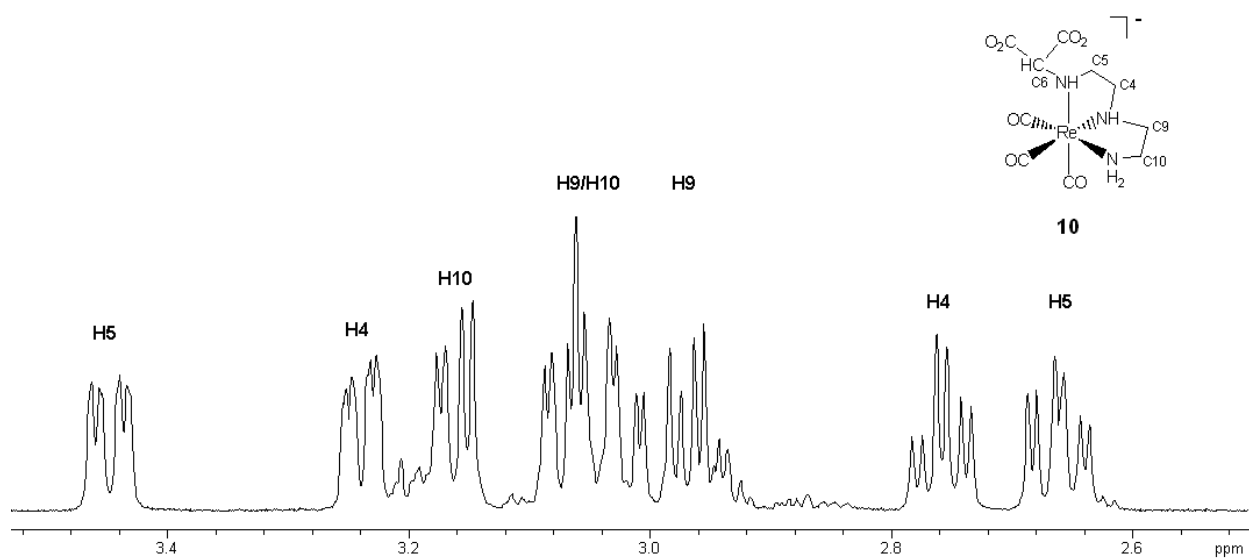

**Table S1.** Re-C Bond Distances (Å) and C-Re-C Bond Angles (°) of [Re(CO)<sub>3</sub>(DTGH)-NNO]PF<sub>6</sub>•H<sub>2</sub>O (**5** PF<sub>6</sub>•H<sub>2</sub>O), [Re(CO)<sub>3</sub>(DTG)-NNO]•H<sub>2</sub>O (**6**•H<sub>2</sub>O), [Re(CO)<sub>3</sub>(UEDDAH)-NNO] (**8**), [Re(CO)<sub>3</sub>(DTMH)-NNO]•2H<sub>2</sub>O (**9**•2H<sub>2</sub>O) and [Re(CO)<sub>3</sub>(DTA)-NNN]•CH<sub>3</sub>OH (**12**•CH<sub>3</sub>OH).

|                 | <b>5</b> PF <sub>6</sub> •H <sub>2</sub> O | <b>6</b> •H <sub>2</sub> O | <b>8</b> | <b>9</b> •2H <sub>2</sub> O | <b>12</b> •CH <sub>3</sub> OH |
|-----------------|--------------------------------------------|----------------------------|----------|-----------------------------|-------------------------------|
| Re(1)–C(1)      | 1.908(10)                                  | 1.924(13)                  | 1.909(6) | 1.90(4)                     | 1.918(5)                      |
| Re(1)–C(2)      | 1.914(10)                                  | 1.904(12)                  | 1.913(8) | 1.90(3)                     | 1.912(6)                      |
| Re(1)–C(3)      | 1.935(9)                                   | 1.934(14)                  | 1.902(7) | 1.90(3)                     | 1.920(5)                      |
| C(1)–Re(1)–C(2) | 88.6(4)                                    | 91.9(6)                    | 87.8(2)  | 85.2(10)                    | 86.9(2)                       |
| C(1)–Re(1)–C(3) | 88.7(4)                                    | 88.8(6)                    | 90.1(3)  | 89.2(12)                    | 88.87(19)                     |
| C(2)–Re(1)–C(3) | 91.6(4)                                    | 88.5(5)                    | 85.0(3)  | 86.2(10)                    | 90.6(2)                       |
